# Supplementary material for: Heat stress-induced activation of MAPK pathway attenuates Atf1-dependent epigenetic inheritance of heterochromatin in fission yeast
Source: eLife journal article supplement (doi:10.7554/elife.90525), 2024-01-30

Figure 1-figure supplement 2.

**B**

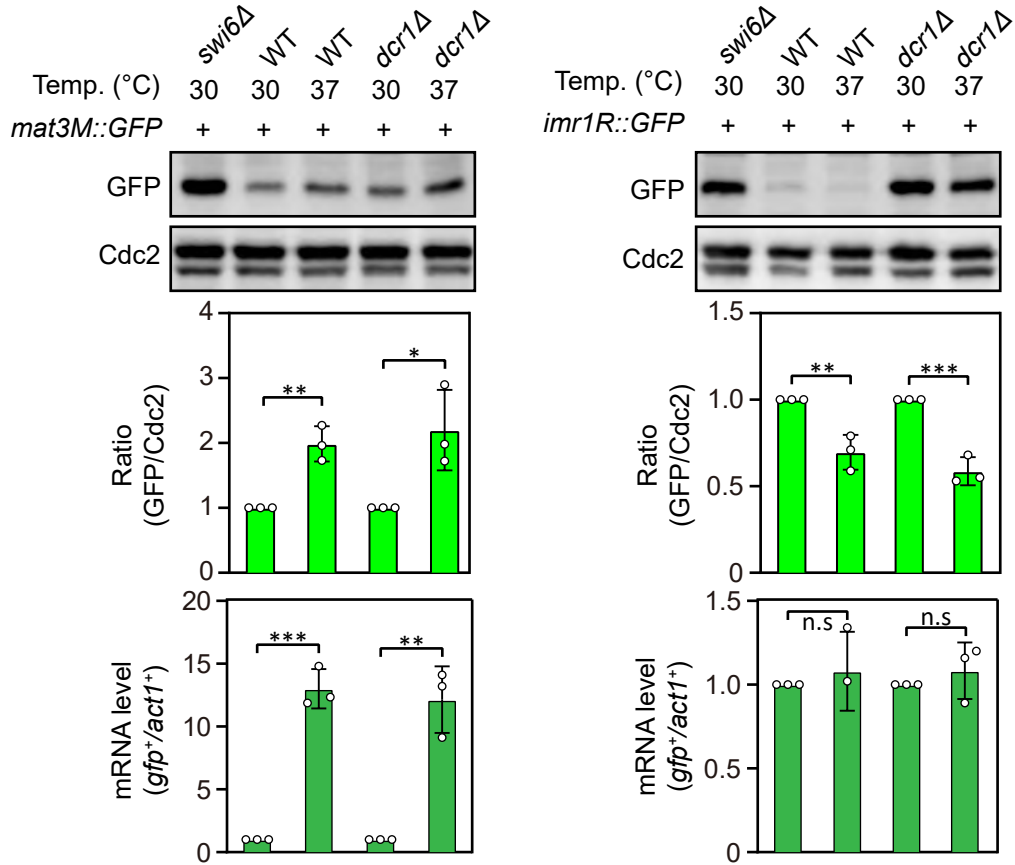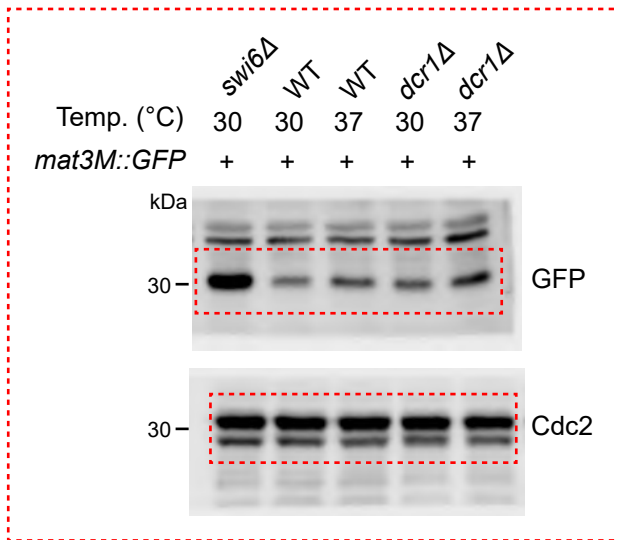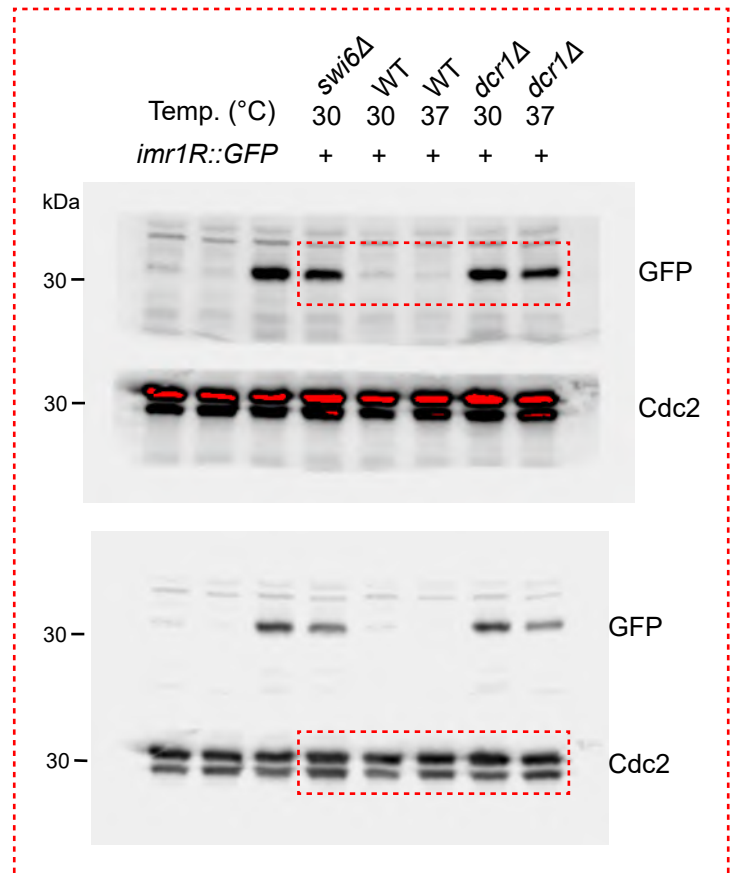

Supplement: fig1-figsupp2-data6 [file elife-90525-fig1-figsupp2-data6-v2.pdf]
