# Supplementary material for: Heat stress-induced activation of MAPK pathway attenuates Atf1-dependent epigenetic inheritance of heterochromatin in fission yeast
Source: eLife journal article supplement (doi:10.7554/elife.90525), 2024-01-30

Sun et al., Figure 3C.

**C**

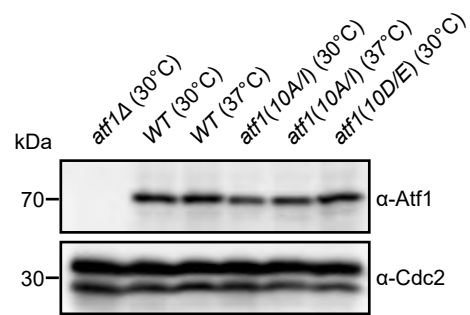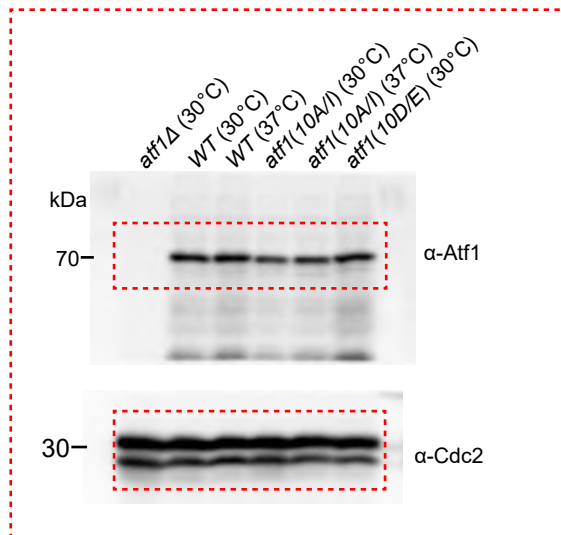

Supplement: fig3-data4 [file elife-90525-fig3-data4-v2.pdf]
