# Supplementary material for: Heat stress-induced activation of MAPK pathway attenuates Atf1-dependent epigenetic inheritance of heterochromatin in fission yeast
Source: eLife journal article supplement (doi:10.7554/elife.90525), 2024-01-30

Figure 4-figure supplement 2A

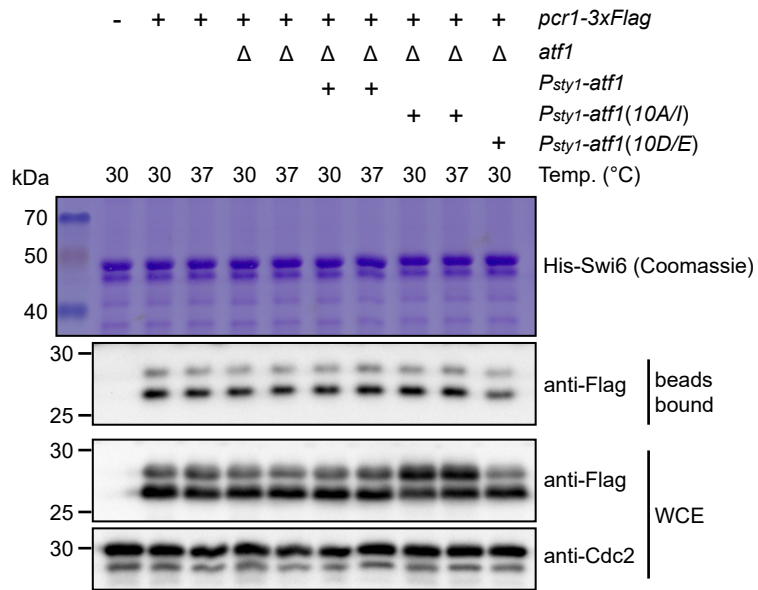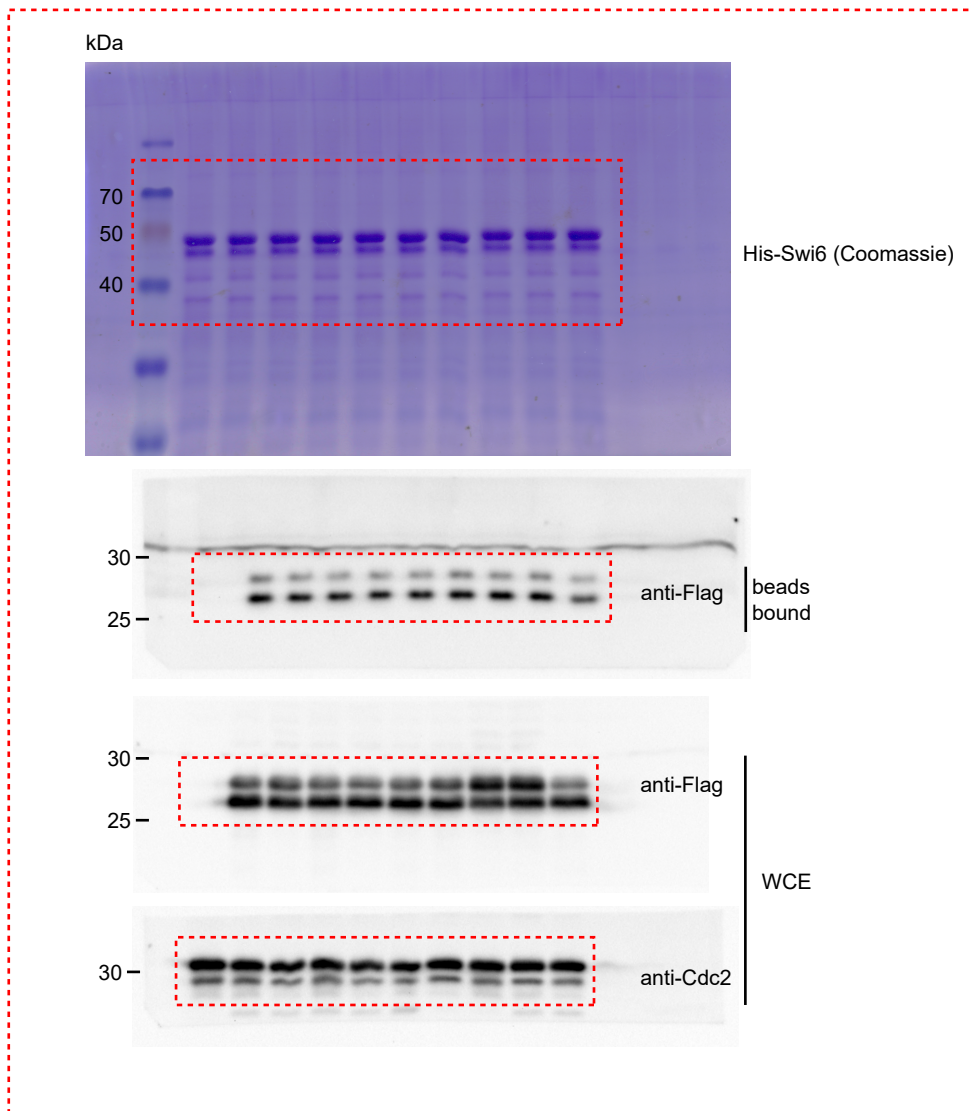

Supplement: fig4-figsupp2-data5 [file elife-90525-fig4-figsupp2-data5-v2.pdf]
