# Supplementary material for: Heat stress-induced activation of MAPK pathway attenuates Atf1-dependent epigenetic inheritance of heterochromatin in fission yeast
Source: eLife journal article supplement (doi:10.7554/elife.90525), 2024-01-30

Figure 5-figure supplement 1E.

**E**

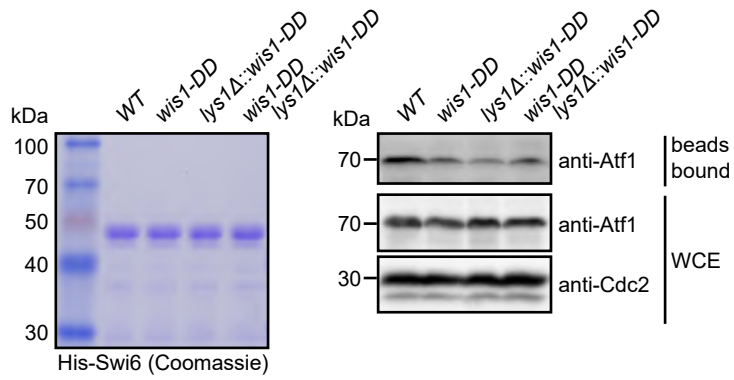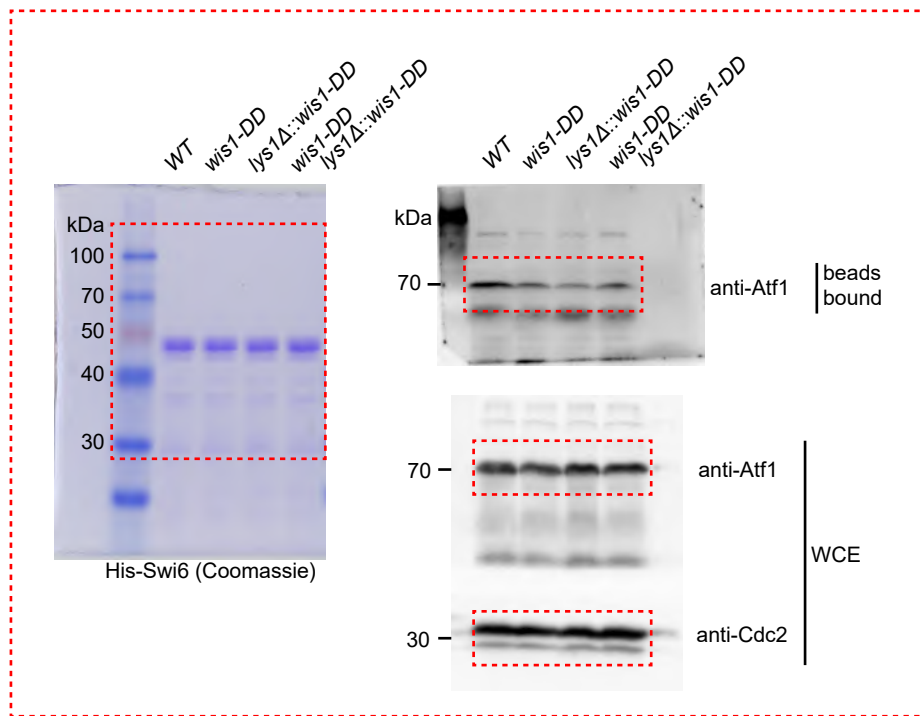

Supplement: fig5-figsupp1-data9 [file elife-90525-fig5-figsupp1-data9-v2.pdf]
