# Supplementary material for: Heat stress-induced activation of MAPK pathway attenuates Atf1-dependent epigenetic inheritance of heterochromatin in fission yeast
Source: eLife. 2024 Jan 30;13:e90525. doi: 10.7554/eLife.90525 (PMC10863984; doi:10.7554/eLife.90525)
Supplement: Figure 1—figure supplement 1—source data 1. [file elife-90525-fig1-figsupp1-data1.xls]

## Sheet: Figure 1-figure supplement 1C
	RT-qPCR:		Repeat #1:	Repeat #2:	Repeat #3:	Mean	SD	P value
Sample #	Genotype:	Temp.(℃)	mRNA levels (ade6+/act1+)	mRNA levels (ade6+/act1+)	mRNA levels (ade6+/act1+)
1	mat3M::ura4+	30	1	1	1	1	0	1 vs 2 P=0.0005
2	mat3M::ura4+	37	5.67	6.14	7.39	6.4	0.888988
3	otr1::ura4+	30	0.49	0.76	0.55	0.6	0.141774	3 vs 4 P=0.0106
4	otr1::ura4+	37	0.98	0.98	1.12	1.02667	0.080829
