# Supplementary material for: Heat stress-induced activation of MAPK pathway attenuates Atf1-dependent epigenetic inheritance of heterochromatin in fission yeast
Source: eLife. 2024 Jan 30;13:e90525. doi: 10.7554/eLife.90525 (PMC10863984; doi:10.7554/eLife.90525)
Supplement: Figure 1—figure supplement 2—source data 1. [file elife-90525-fig1-figsupp2-data1.xlsx]

## Sheet: Figure 1-figure supplement 2B
Protein level of GFP:
				Raw measurement ratio (GFP/Cdc2)			Normalized ratio (GFP/Cdc2)			Mean	SD	P value
			Temp. (℃)	Repeat #1	Repeat #2	Repeat #3	Repeat #1	Repeat #2	Repeat #3
	mat3M::gpf+	wild type	30	0.994225	0.908576	0.753274	1	1	1	1	0	0.0032
		wild type	37	1.71982	1.78453	1.7135	1.72981	1.9641	2.27474	1.98955	0.223195
		dcr1Δ	30	0.666047	0.335307	0.453064	1	1	1	1	0	0.0285
		dcr1Δ	37	0.955834	0.973902	0.780204	1.98495	2.90451	1.72206	2.20384	0.50694
				Raw measurement ratio (GFP/Cdc2)			Normalized ratio (GFP/Cdc2)			Mean	SD
			Temp. (℃)	Repeat #1	Repeat #2	Repeat #3	Repeat #1	Repeat #2	Repeat #3
	imr1R::gpf+	wild type	30	0.938384	0.373765	0.646448	1	1	1	1	0	0.0064
		wild type	37	0.666253	0.220521	0.510694	0.71	0.59	0.79	0.696667	0.0821922
		dcr1Δ	30	9.37374	4.37374	3.94849	1	1	1	1	0	0.0009
		dcr1Δ	37	4.96808	2.40556	2.68497	0.53	0.55	0.68	0.586667	0.0664998
mRNA level of GFP:
				Normalized ratio (gfp/act1+)			Mean	SD	P value
			Temp. (℃)	Repeat #1	Repeat #2	Repeat #3
	mat3M::gpf+	wild type	30	1	1	1	1	0	0.0002
		wild type	37	11.88	12.34	14.8	13.0067	1.28191
		dcr1Δ	30	1	1	1	1	0	0.0019
		dcr1Δ	37	13.2	14.1	9.12	12.14	2.16684
				Normalized ratio (gfp/act1+)			Mean	SD
			Temp. (℃)	Repeat #1	Repeat #2	Repeat #3
	imr1R::gpf+	wild type	30	1	1	1	1	0	0.5883
		wild type	37	0.88	1.34	1.02	1.08	0.192527
		dcr1Δ	30	1	1	1	1	0	0.4403
		dcr1Δ	37	1.2	0.89	1.16	1.08333	0.137679
