# Supplementary material for: Heat stress-induced activation of MAPK pathway attenuates Atf1-dependent epigenetic inheritance of heterochromatin in fission yeast
Source: eLife. 2024 Jan 30;13:e90525. doi: 10.7554/eLife.90525 (PMC10863984; doi:10.7554/eLife.90525)
Supplement: Figure 1—source data 1. [file elife-90525-fig1-data1.xls]

## Sheet: Figure1C
	Genotype:	mat3M::ade6+			otr1::ade6+
	Temp.(℃)	30℃	37℃		30℃	37℃
	White	0	0		0	0
	Variegated	0	164		0	0
	Red	512	964		556	841
	White	0	0		0	0
	Variegated	0	0.1454		0	0
	Red	1	0.8546		1	1

## Sheet: Figure1D
			Repeat #1:	Repeat #2:	Repeat #3:	Mean	SD	P value
Samples	Genotype:	Temp.(℃)	mRNA levels (ade6+/act1+)	mRNA levels (ade6+/act1+)	mRNA levels (ade6+/act1+)
1	mat3M::ade6+	30	1	1	1	1	0
2	mat3M::ade6+	37	10.64	8.44	7.34	8.80667	1.68028	1 vs 2 P=0.0017
3	otr1::ade6+	30	0.43	0.96	0.57	0.653333	0.274651
4	otr1::ade6+	37	1.58	1.75	1.99	1.77333	0.205994	3 vs 4 P=0.2672

## Sheet: Figure1E
	Sample #	1	2	3	1	2	3	1	2	3	1	2	3
	H3K9me2 ChIP:	mat2Pc(mat locus) Normalized to tub1+			CenH(mat locus) Normalized to tub1+			s2(mat locus) Normalized to tub1+			ade6+(mat locus) Normalized to tub1+
	Genotype:	mat3M::ade6+			mat3M::ade6+			mat3M::ade6+			mat3M::ade6+
		clr4Δ (30℃)	WT (30℃)	WT (37℃)	clr4Δ (30℃)	WT (30℃)	WT (37℃)	clr4Δ (30℃)	WT (30℃)	WT (37℃)	clr4Δ (30℃)	WT (30℃)	WT (37℃)
	Repeat #1	0.37	3.12	1.99	0.25	8.8	4.21	0.8	8.78	4.99	0.43	7.2	4.67
	Repeat #2	0.469689	3.55611	2.07147	1.00254	12.8425	6.8066	1.60619	11.853	7.00298	0.916574	9.98974	5.71657
	Repeat #3	0.41	3.25	1.61	0.77	10.23	5.43	1.01	13.23	6.48	0.74	8.02	4.99
	mean	0.416563	3.3087	1.89049	0.674181	10.6242	5.4822	1.13873	11.2877	6.15766	0.695525	8.40325	5.12552
	SD	0.0501674	0.223905	0.246303	0.385314	2.04985	1.29909	0.418225	2.27823	1.04449	0.246317	1.43381	0.536284
	P value		2 vs 3 P=0.0018			2 vs 3 P=0.0214			2 vs 3 P=0.0239			2 vs 3 P=0.0207
		dg(Centromere) Normalized to tub1+
	Genotype:	mat3M::ade6+
		clr4Δ (30℃)	WT (30℃)	WT (37℃)
	Repeat #1	0.21	15.66	5.35
	Repeat #2	0.134048	16.5932	9.15389
	Repeat #3	0.19	12.33	4.55
	mean	0.178016	14.8611	6.3513
	SD	0.0393685	2.24108	2.45986
	P value		2 vs 3 P=0.0114
	Sample #	1	2	3	1	2	3	1	2	3	1	2	3
	H3K9me3 ChIP:	mat2Pc(mat locus) Normalized to tub1+			CenH(mat locus) Normalized to tub1+			s2(mat locus) Normalized to tub1+			ade6+(mat locus) Normalized to tub1+
	Genotype:	mat3M::ade6+			mat3M::ade6+			mat3M::ade6+			mat3M::ade6+
		clr4Δ (30℃)	WT (30℃)	WT (37℃)	clr4Δ (30℃)	WT (30℃)	WT (37℃)	clr4Δ (30℃)	WT (30℃)	WT (37℃)	clr4Δ (30℃)	WT (30℃)	WT (37℃)
	Repeat #1	0.24892	5.63355	3.3991	0.487145	8.64883	8.04023	0.161829	6.24677	4.59199	0.474246	4.32199	3.41789
	Repeat #2	0.173812	6.0969	3.93901	0.535859	9.51371	9.98425	0.178012	5.87145	3.05119	0.521671	6.75419	2.75968
	Repeat #3	0.323596	6.02361	4.71883	0.633288	12.2435	13.9723	0.210378	8.1208	4.96959	0.61652	5.91858	4.04326
	mean	0.248776	5.91802	4.01898	0.552097	10.1353	10.6656	0.183406	6.74634	4.20426	0.537479	5.66492	3.40694
	SD	0.0748921	0.249071	0.663489	0.0744126	1.87622	3.02416	0.0247198	1.20502	1.01628	0.0724423	1.23578	0.641859
	P value		2 vs 3 P=0.0097			2 vs 3 P=0.8091			2 vs 3 P=0.0492			2 vs 3 P=0.0484
		dg(Centromere) Normalized to tub1+
	Genotype:	mat3M::ade6+
		clr4Δ (30℃)	WT (30℃)	WT (37℃)
	Repeat #1	0.333606	4.53761	5.05021
	Repeat #2	0.400327	5.44513	6.06026
	Repeat #3	0.560458	7.62318	8.48436
	mean	0.431464	5.86864	6.53161
	SD	0.116587	1.58578	1.76493
	P value		2 vs 3 P=0.6537
