# Supplementary material for: Heat stress-induced activation of MAPK pathway attenuates Atf1-dependent epigenetic inheritance of heterochromatin in fission yeast
Source: eLife. 2024 Jan 30;13:e90525. doi: 10.7554/eLife.90525 (PMC10863984; doi:10.7554/eLife.90525)
Supplement: Figure 2—figure supplement 1—source data 1. [file elife-90525-fig2-figsupp1-data1.xls]

## Sheet: dcr1Δ
			Repeat #1:	Repeat #2:	Repeat #3:	Mean	SD	P value
	Genotype:	Temp.(℃)	mRNA levels (ade6+/act1+)	mRNA levels (ade6+/act1+)	mRNA levels (ade6+/act1+)
1	mat3M::ade6+	30	1	1	1	1	0
2	mat3M::ade6+ clr4Δ	30	59.75	57.44	55.22	57.47	2.26515
3	mat3M::ade6+ dcr1Δ(red)	30	3.17	2.67	3.99	3.27667	0.666433
4	mat3M::ade6+ dcr1Δ(red)	37	4.08	3.01	3.21	3.43333	0.568888	3 vs 4 P=0.7723
5	mat3M::ade6+ dcr1Δ(variegated)	30	34.23	33.22	37.01	34.82	1.96268
6	mat3M::ade6+ dcr1Δ(variegated)	37	32.41	31.99	38.66	34.3533	3.73559	5 vs 6 P=0.8574
			Repeat #1:	Repeat #2:	Repeat #3:	Mean	SD	P value
	Genotype:	Temp.(℃)	mRNA levels (cenH/act1+)	mRNA levels (cenH/act1+)	mRNA levels (cenH/act1+)
1	mat3M::ade6+	30	1	1	1	1	0
2	mat3M::ade6+ clr4Δ	30	162.954	155.44	149.66	156.018	6.66605
3	mat3M::ade6+ dcr1Δ(red)	30	3.33274	3.02	2.99	3.11425	0.189815
4	mat3M::ade6+ dcr1Δ(red)	37	3.11559	4.11	5.32	4.18186	1.10396	3 vs 4 P=0.1727
5	mat3M::ade6+ dcr1Δ(variegated)	30	100.351	97.34	95.44	97.7102	2.47622
6	mat3M::ade6+ dcr1Δ(variegated)	37	96.9919	97.67	96.79	97.1506	0.460969	5 vs 6 P=0.7197
			Repeat #1:	Repeat #2:	Repeat #3:	Mean	SD	P value
	Genotype:	Temp.(℃)	mRNA levels (dg/act1+)	mRNA levels (dg/act1+)	mRNA levels (dg/act1+)
1	mat3M::ade6+	30	1	1	1	1	0
2	mat3M::ade6+ clr4Δ	30	231.916	239.44	238.89	236.749	4.1941
3	mat3M::ade6+ dcr1Δ(red)	30	222.548	217.33	210.33	216.736	6.13059
4	mat3M::ade6+ dcr1Δ(red)	37	322.094	317.23	310.38	316.568	5.88482	3 vs 4 P=0.0001
5	mat3M::ade6+ dcr1Δ(variegated)	30	226.163	215.33	220.98	220.824	5.41832
6	mat3M::ade6+ dcr1Δ(variegated)	37	347.419	325.23	346.48	339.71	12.5484	5 vs 6 P=0.0001
