# Supplementary material for: Heat stress-induced activation of MAPK pathway attenuates Atf1-dependent epigenetic inheritance of heterochromatin in fission yeast
Source: eLife. 2024 Jan 30;13:e90525. doi: 10.7554/eLife.90525 (PMC10863984; doi:10.7554/eLife.90525)
Supplement: Figure 2—source data 1. [file elife-90525-fig2-data1.xls]

## Sheet: Figure2B
1st plating:	Genotype:	mat3M::ade6+			dcr1Δ mat3M::ade6+
	Temp.(℃)	30℃	37℃		30℃	37℃
	White	0	0		0	0
	Variegated	0	86		0	110
	Red	524	468		686	520
	White	0	0		0	0
	Variegated	0	0.1552		0	0.1746
	Red	1	0.8448		1	0.8254
2nd plating	Genotype:	dcr1Δ mat3M::ade6+							Genotype:	mat3M::ade6+
		Colony #1		Colony #2		Colony #3				Colony #1		Colony #2		Colony #3
	Temp.(℃)	30℃	37℃	30℃	37℃	30℃	37℃		Temp.(℃)	30℃	37℃	30℃	37℃	30℃	37℃
	White	0	68	0	102	0	90		White	0	0	0	0	0	0
	Variegated	668	688	508	602	512	578		Variegated	0	406	2	168	0	186
	Red	202	78	174	118	244	176		Red	605	462	618	296	282	224
	White	0	0.0815	0	0.1241	0	0.1066		White	0	0	0	0	0	0
	Variegated	0.7678	0.825	0.7449	0.7324	0.6772	0.6848		Variegated	0	0.4677	0.003	0.3621	0	0.4537
	Red	0.2322	0.0935	0.2551	0.1435	0.3238	0.2086		Red	1	0.5323	0.997	0.6379	1	0.5463

## Sheet: Figure2C
			Repeat #1:	Repeat #2:	Repeat #3:	mean	SD	P value
Sample #	Genotype:	Temp.(℃)	mRNA levels (ade6+/act1+)	mRNA levels (ade6+/act1+)	mRNA levels (ade6+/act1+)
1	mat3M::ade6+	30	1	1	1	1	0
2	mat3M::ade6+ clr4Δ	30	58.3577	61.1575	68.3235	62.6129	5.13981
3	mat3M::ade6+(OFF) dcr1Δ	30	4.27851	3.50843	3.13651	3.64115	0.582454
4	mat3M::ade6+(ON) dcr1Δ#1	30	40.7139	41.7516	50.1119	44.1925	5.15258	3 vs 4 P=0.0002
5	mat3M::ade6+(ON) dcr1Δ#2	30	48.8045	49.1898	58.4135	52.1359	5.43994	3 vs 5 P=0.0001
6	mat3M::ade6+(ON) dcr1Δ#3	30	39.0667	40.2345	59.1347	46.1453	11.2643	3 vs 6 P=0.0028
Sample #	Genotype:	Temp.(℃)	mRNA levels (cenH/act1+)	mRNA levels (cenH/act1+)	mRNA levels (cenH/act1+)
1	mat3M::ade6+	30	1	1	1	1	0
2	mat3M::ade6+ clr4Δ	30	173.753	133.272	161.272	156.099	20.7301
3	mat3M::ade6+(OFF) dcr1Δ	30	2.14723	1.08531	2.03531	1.75595	0.583484
4	mat3M::ade6+(ON) dcr1Δ#1	30	85.4125	100.392	90.9916	92.2652	7.57029	3 vs 4 P=0.0001
5	mat3M::ade6+(ON) dcr1Δ#2	30	98.1245	99.9117	97.2117	98.416	1.3734	3 vs 5 P=0.0001
6	mat3M::ade6+(ON) dcr1Δ#3	30	74.6851	77.0468	87.9468	79.8929	7.07414	3 vs 6 P=0.0001
Sample #	Genotype:	Temp.(℃)	mRNA levels (dg/act1+)	mRNA levels (dg/act1+)	mRNA levels (dg/act1+)
1	mat3M::ade6+	30	1	1	1	1	0
2	mat3M::ade6+ clr4Δ	30	153.454	178.454	168.799	166.902	12.6075
3	mat3M::ade6+(OFF) dcr1Δ	30	135.279	120.279	138.806	131.454	9.83808
4	mat3M::ade6+(ON) dcr1Δ#1	30	132.714	127.714	145.985	135.471	9.44258	3 vs 4 P=0.6368
5	mat3M::ade6+(ON) dcr1Δ#2	30	140.804	135.804	134.885	137.165	3.18556	3 vs 5 P=0.3930
6	mat3M::ade6+(ON) dcr1Δ#3	30	118.067	103.067	139.873	120.336	18.5079	3 vs 6 P=0.4102

## Sheet: Figure2D
H3K9me3 ChIP:	Sample #	1	2	3	4	1	2	3	4	1	2	3	4	1	2	3	4
		mat2Pc(mat locus) Normalized to tub1+				CenH(mat locus) Normalized to tub1+				s2(mat locus) Normalized to tub1+				ade6+(mat locus) Normalized to tub1+
	Genotype:	mat3M::ade6+				mat3M::ade6+				mat3M::ade6+				mat3M::ade6+
		clr4Δ (30℃)	WT (30℃)	dcr1ΔR (30℃)	dcr1ΔV (30℃)	clr4Δ (30℃)	WT (30℃)	dcr1ΔR (30℃)	dcr1ΔV (30℃)	clr4Δ (30℃)	WT (30℃)	dcr1ΔR (30℃)	dcr1ΔV (30℃)	clr4Δ (30℃)	WT (30℃)	dcr1ΔR (30℃)	dcr1ΔV (30℃)
	Repeat #1	1.76403	6.34772	6.03056	2.39651	1.07439	5.42215	4.17481	1.53396	1.38698	5.90365	4.81898	1.84986	2.23516	8.80769	8.35924	2.60172
	Repeat #2	1.02291	5.8399	5.94811	2.00479	0.996701	6.0488	5.02726	1.99415	1.06437	7.08438	5.78278	2.21984	2.01164	7.82692	7.62332	2.04155
	Repeat #3	0.992224	5.96471	5.76967	1.54464	1.09637	6.15368	5.12998	2.49356	0.989864	6.58848	5.07798	2.46445	1.91106	7.63558	7.94215	1.93947
	mean	1.25972	6.05078	5.91611	1.98198	1.05582	5.87488	4.77735	2.00722	1.14707	6.52551	5.22658	2.17805	2.05262	8.09007	7.9749	2.19425
	SD	0.437016	0.264624	0.133355	0.42639	0.0523647	0.395562	0.524335	0.479935	0.211077	0.592879	0.498785	0.309416	0.165889	0.628805	0.369054	0.356555
	P value			3 vs 4 P=0.0001				3 vs 4 P=0.0025				3 vs 4 P=0.0008				3 vs 4 P=0.0001
	Sample #	1	2	3	4
		dg(Centromere) Normalized to tub1+
	Genotype:	mat3M::ade6+
		clr4Δ (30℃)	WT (30℃)	dcr1ΔR (30℃)	dcr1ΔV (30℃)
	Repeat #1	1.09984	8.126	1.27702	0.969247
	Repeat #2	1.05585	10.801	1.92594	1.93048
	Repeat #3	0.939707	7.61286	1.51409	1.71812
	mean	1.0318	8.84661	1.57235	1.53928
	SD	0.0827332	1.71186	0.328359	0.504955
	P value			3 vs 4 P=0.9288
