# Supplementary material for: Heat stress-induced activation of MAPK pathway attenuates Atf1-dependent epigenetic inheritance of heterochromatin in fission yeast
Source: eLife. 2024 Jan 30;13:e90525. doi: 10.7554/eLife.90525 (PMC10863984; doi:10.7554/eLife.90525)
Supplement: Figure 3—figure supplement 2—source data 3. [file elife-90525-fig3-figsupp2-data3.xls]

## Sheet: Figure 3-figure supplement 2D
			Repeat #1:	Repeat #2:	Repeat #3:	Mean	SD	P value
	Genotype:	Temp.(℃)	mRNA levels (ade6+/act1+)	mRNA levels (ade6+/act1+)	mRNA levels (ade6+/act1+)
1	mat3M::ade6+	30	1	1	1	1	0
2	mat3M::ade6+	37	8.43	8.77	9.25	8.81667	0.411987	1 vs 2 P=0.0001
3	mat3M::ade6+ atf1(10A/I)	30	1.01	1.04	1.03	1.02667	0.0152753
4	mat3M::ade6+ atf1(10A/I)	37	5.13	5.11	6.13	5.45667	0.58321	3 vs 4 P=0.0002	2 vs 4 P=0.0012
5	mat3M::ade6+ atf1(10D/E)	30	1.02	1.01	0.98	1.00333	0.0208167
6	mat3M::ade6+ atf1(10D/E)	37	12.11	13.34	13.25	12.9	0.685638	5 vs 6 P=0.0001	4 vs 6 P=0.0001

## Sheet: Figure 3-figure supplement 2E
		1	2	3	4	5	6	7	8	9
		s1 (mat locus) Normalized to tub1+
	Genotype:	mat3M::ade6+ ade6-DN/N
		atf1Δ	wt		atf1(10A/I)		atf1(10D/E)		atf1Δ Psty1-atf1
	Temp.	30℃	30℃	37℃	30℃	37℃	30℃	37℃	30℃	37℃
	Repeat #1	0.673914	1.3427	1.35395	1.57334	1.56266	1.37304	1.41893	1.33595	1.40258
	Repeat #2	0.741305	1.42697	1.38935	1.63068	1.61892	1.41034	1.46082	1.36954	1.44284
	Repeat #3	0.633892	1.3127	1.27545	1.51437	1.60273	1.30624	1.40621	1.35585	1.42841
	mean	0.683037	1.36079	1.33958	1.5728	1.59477	1.36321	1.42865	1.35378	1.42461
	SD	0.0542846	0.0592439	0.0582903	0.0581553	0.0289655	0.0527435	0.0285737	0.0168925	0.0203962
	P value		2 vs 3 P=0.9448		4 vs 5 P=0.4789		6 vs 7 P=0.8465		8 vs 9 P=0.8492
			2 vs 8 P=0.6211		3 vs 5 P=0.0025				3 vs 9 P=0.7681
			2 vs 4 P=0.0115		3 vs 7 P=0.0763
			2 vs 6 P=0.9605
		1	2	3	4	5	6	7	8	9
		s2 (mat locus) Normalized to tub1+
	Genotype:	mat3M::ade6+ ade6-DN/N
		atf1Δ	wt		atf1(10A/I)		atf1(10D/E)		atf1Δ Psty1-atf1
	Temp.	30℃	30℃	37℃	30℃	37℃	30℃	37℃	30℃	37℃
	Repeat #1	0.533444	1.8427	1.85395	2.47334	2.06266	1.87304	1.91893	1.83595	1.90258
	Repeat #2	0.365403	2.00533	2.01658	2.23597	2.22528	2.13567	2.08156	2.19857	2.06521
	Repeat #3	0.596204	2.42832	2.34082	2.17349	2.47273	2.27315	2.42414	2.24305	2.19486
	mean	0.49835	2.09212	2.07045	2.29427	2.25356	2.09395	2.14154	2.09252	2.05421
	SD	0.119336	0.302302	0.247866	0.158199	0.206496	0.203292	0.257895	0.223314	0.146448
	P value		2 vs 3 P=0.9281		4 vs 5 P=0.7997		6 vs 7 P=0.8142		8 vs 9 P=0.8160
			2 vs 8 P=0.9986		3 vs 5 P=0.3812				3 vs 9 P=0.9269
			2 vs 4 P=0.3628		3 vs 7 P=0.7480
			2 vs 6 P=0.9935
		1	2	3	4	5	6	7	8	9
		SPCC320.03 (euchromatin locus) Normalized to tub1+
	Genotype:	mat3M::ade6+ ade6-DN/N
		atf1Δ	wt		atf1(10A/I)		atf1(10D/E)		atf1Δ Psty1-atf1
	Temp.	30℃	30℃	37℃	30℃	37℃	30℃	37℃	30℃	37℃
	Repeat #1	0.522066	3.07191	4.92913	3.47019	4.9815	3.43129	4.01411	4.22922	5.88258
	Repeat #2	0.522014	3.47157	4.02868	3.56985	4.68103	3.43095	4.71364	4.3288	5.58203
	Repeat #3	0.694751	3.54431	4.70142	3.64258	4.15377	3.00369	4.98638	4.00154	5.05477
	mean	0.57961	3.3626	4.55308	3.56088	4.60543	3.28864	4.57138	4.18652	5.50646
	SD	0.099715	0.254356	0.468196	0.0865447	0.419012	0.246779	0.501502	0.167758	0.419048
	P value		2 vs 3 P=0.018		4 vs 5 P=0.0134		6 vs 7 P=0.0165		8 vs 9 P=0.0072
			2 vs 8 P=0.0094		3 vs 5 P=0.8922				3 vs 9 P=0.0583
			2 vs 4 P=0.2703		3 vs 7 P=0.9654
			2 vs 6 P=0.7360
