# Supplementary material for: Heat stress-induced activation of MAPK pathway attenuates Atf1-dependent epigenetic inheritance of heterochromatin in fission yeast
Source: eLife. 2024 Jan 30;13:e90525. doi: 10.7554/eLife.90525 (PMC10863984; doi:10.7554/eLife.90525)
Supplement: Figure 3—source data 1. [file elife-90525-fig3-data1.xlsx]

## Sheet: Figure3A
Atf1 ChIP:	Sample #	1	2	3	1	2	3	1	2	3
		s1(mat locus) Normalized to tub1+			s2(mat locus) Normalized to tub1+			SPCC320.03 Normalized to tub1+
	Genotype:	atf1Δ (30℃)	WT (30℃)	WT (37℃)	clr4Δ (30℃)	WT (30℃)	WT (37℃)	clr4Δ (30℃)	WT (30℃)	WT (37℃)
	Repeat #1	0.9951	2.13128	2.2296	0.961361	2.83849	2.82286	0.917187	7.14534	9.13047
	Repeat #2	1.09461	2.34441	2.45256	0.942224	3.62573	3.61019	0.772035	8.15678	11.5717
	Repeat #3	0.935394	2.20341	2.09583	1.0575	3.22234	3.40515	1.10062	8.0744	10.9566
	mean	1.00837	2.22637	2.25933	0.987027	3.22885	3.2794	0.929949	7.79217	10.5529
	SD	0.080433	0.108403	0.180217	0.0617743	0.393659	0.408448	0.164666	0.561691	1.2697
	P value		2 vs 3 P=0.7994			2 vs 3 P=0.8848			2 vs 3 P=0.0262

## Sheet: Figure3D
	Genotype:	mat3M::ade6+ atf1Δ Psty1-atf1			mat3M::ade6+ atf1Δ Psty1-atf1(10A/I)
	Temp.(℃)	30℃	37℃		30℃	37℃
	White	0	0		0	0
	Variegated	0	50		0	4
	Red	628	460		577	784
	White	0	0		0	0
	Variegated	0	0.098		0	0.005
	Red	1	0.902		1	0.995

## Sheet: Figure3E
		RT-qPCR	Repeat #1:	Repeat #2:	Repeat #3:	mean	SD	P value
Sample #	Genotype:	Temp.(℃)	mRNA levels (ade6+/act1+)	mRNA levels (ade6+/act1+)	mRNA levels (ade6+/act1+)
1	mat3M::ade6+ atf1Δ Psty1-atf1	30	1	1	1	1	0
2	mat3M::ade6+ atf1Δ Psty1-atf1	37	15.5062	12.0699	13.2061	13.5941	1.75072	1 vs 2 P=0.0002
3	mat3M::ade6+ atf1Δ Psty1-atf1(10A/I)	30	1.09833	0.991802	0.81892	0.969683	0.141011
4	mat3M::ade6+ atf1Δ Psty1-atf1(10A/I)	37	7.01232	4.79331	3.67453	5.16005	1.69885	3 vs 4 P=0.0131	2 vs 4 P=0.0039

## Sheet: Figure3F
	Atf1 ChIP:	Sample #	1	2	3	4	5	1	2	3	4	5	1	2	3	4	5
			s1(mat locus) Normalized to tub1+					s2(mat locus) Normalized to tub1+					SPCC320.03 Normalized to tub1+
		Temp.(℃)	30	30	37	30	37	30	30	37	30	37	30	30	37	30	37
		Genotype:	atf1Δ	atf1	atf1	atf1(10A/I)	atf1(10A/I)	atf1Δ	atf1	atf1	atf1(10A/I)	atf1(10A/I)	atf1Δ	atf1	atf1	atf1(10A/I)	atf1(10A/I)
		Repeat #1	0.852049	2.58307	2.59394	3.38661	3.41079	0.613959	2.33959	2.43101	3.84233	3.92317	0.817057	5.63071	10.7839	6.66204	13.7626
		Repeat #2	0.941079	2.90214	2.91357	3.46236	3.51325	0.809999	3.13462	3.02433	4.19053	4.13053	0.42608	4.76591	8.96127	6.43611	11.4113
		Repeat #3	0.792405	2.40225	2.41237	3.14954	3.17203	0.736751	2.80751	2.91721	3.6508	3.62781	0.735351	5.06764	9.70547	7.79583	12.3863
		mean	0.861844	2.62915	2.63996	3.33284	3.36536	0.720236	2.76057	2.79085	3.89455	3.89383	0.659496	5.15476	9.81686	6.96466	12.5201
		SD	0.0748193	0.253109	0.253749	0.163192	0.175088	0.0990579	0.399588	0.316201	0.273625	0.252641	0.206231	0.438931	0.916387	0.728629	1.18135
		P value			2 vs 3 P=0.9609		4 vs 5 P=0.8255			2 vs 3 P=0.9230		4 vs 5 P=0.9975			2 vs 3 P=0.0014		4 vs 5 P=0.0023
						2 vs 4 P=0.0155					2 vs 4 P=0.0154					2 vs 4 P=0.0211

## Sheet: Figure3G
	Sample #	1	2	3	4	1	2	3	4	1	2	3	4	1	2	3	4
H3K9me3 ChIP：		mat2Pc(mat locus) Normalized to tub1+				CenH(mat locus) Normalized to tub1+				s2(mat locus) Normalized to tub1+				ade6+(mat locus) Normalized to tub1+
	Genotype:	mat3M::ade6+ atf1Δ				mat3M::ade6+ atf1Δ				mat3M::ade6+ atf1Δ				mat3M::ade6+ atf1Δ
		atf1	atf1	atf1(10A/I)	atf1(10A/I)	atf1	atf1	atf1(10A/I)	atf1(10A/I)	atf1	atf1	atf1(10A/I)	atf1(10A/I)	atf1	atf1	atf1(10A/I)	atf1(10A/I)
	Temp.	30℃	37℃	30℃	37℃	30℃	37℃	30℃	37℃	30℃	37℃	30℃	37℃	30℃	37℃	30℃	37℃
	Repeat #1	3.24663	1.89326	3.31954	2.70052	11.6763	12.7081	12.538	13.0303	4.18044	3.22141	4.94538	4.12881	12.0281	8.35782	12.9816	11.1882
	Repeat #2	3.89596	2.07192	3.98345	3.34062	13.0115	14.2498	13.0456	14.6363	5.01653	3.8657	5.13445	4.95457	14.4337	9.02938	14.5779	13.4259
	Repeat #3	3.81804	2.03048	3.90378	3.27381	12.7513	12.9648	12.7847	12.3436	4.91619	3.48838	5.03176	4.85548	14.145	8.8488	14.2863	13.6574
	mean	3.65354	1.99855	3.73559	3.10498	12.4797	13.3076	12.7894	13.3368	4.70439	3.52517	5.0372	4.64629	13.5356	8.74533	13.9486	12.7572
	SD	0.354542	0.0935074	0.362504	0.351866	0.707849	0.826003	0.25383	1.17669	0.456517	0.323713	0.0946547	0.450879	1.31351	0.347531	0.850061	1.36365
	P value	1 vs 2 P=0.0014		3 vs 4 P=0.0967		1 vs 2 P=0.2579		3 vs 4 P=0.4750		1 vs 2 P=0.0218		3 vs 4 P=0.2156		1 vs 2 P=0.0036		3 vs 4 P=0.2684
	Sample #	1	2	3	4
		dg(Centromere) Normalized to tub1+
	Genotype:	mat3M::ade6+ atf1Δ
		atf1	atf1	atf1(10A/I)	atf1(10A/I)
	Temp.	30℃	37℃	30℃	37℃
	Repeat #1	9.40953	11.459	12.5751	12.0815
	Repeat #2	10.3505	10.5049	10.6326	10.2897
	Repeat #3	10.3154	10.3545	10.4693	10.9607
	mean	10.0252	10.7728	11.2257	11.1106
	SD	0.53343	0.599036	1.17147	0.905284
	P value	1 vs 2 P=0.1817		3 vs 4 P=0.8994
	Sample #	1	2	3	4	1	2	3	4	1	2	3	4	1	2	3	4
Swi6 ChIP：		mat2Pc(mat locus) Normalized to tub1+				CenH(mat locus) Normalized to tub1+				s2(mat locus) Normalized to tub1+				ade6+(mat locus) Normalized to tub1+
	Genotype:	mat3M::ade6+ atf1Δ				mat3M::ade6+ atf1Δ				mat3M::ade6+ atf1Δ				mat3M::ade6+ atf1Δ
		atf1	atf1	atf1(10A/I)	atf1(10A/I)	atf1	atf1	atf1(10A/I)	atf1(10A/I)	atf1	atf1	atf1(10A/I)	atf1(10A/I)	atf1	atf1	atf1(10A/I)	atf1(10A/I)
	Temp.	30℃	37℃	30℃	37℃	30℃	37℃	30℃	37℃	30℃	37℃	30℃	37℃	30℃	37℃	30℃	37℃
	Repeat #1	3.24663	1.89326	3.31954	2.90052	4.67628	4.50814	4.53797	4.03029	4.68044	3.22141	4.94538	4.62881	3.92809	2.35782	3.98158	3.18825
	Repeat #2	3.89596	2.17192	3.88345	3.34062	4.01153	4.14976	4.04556	4.63635	5.01653	3.0657	5.03445	4.95457	3.43371	2.02938	3.5779	3.4259
	Repeat #3	3.61804	2.03048	3.90378	3.47381	4.7513	4.16477	4.78465	4.34362	4.91619	3.48838	4.83176	4.85548	3.54503	2.8488	3.28634	3.65738
	mean	3.58688	2.03189	3.70225	3.23832	4.4797	4.27422	4.45606	4.33675	4.87105	3.2585	4.9372	4.81296	3.63561	2.412	3.61527	3.42384
	SD	0.325783	0.139332	0.331597	0.300026	0.40718	0.202714	0.376291	0.303087	0.172531	0.213769	0.101592	0.166993	0.259339	0.412384	0.349124	0.234573
	P value	1 vs 2 P=0.0016		3 vs 4 P=0.1468		1 vs 2 P=0.8184		3 vs 4 P=0.6909		1 vs 2 P=0.0005		3 vs 4 P=0.3327		1 vs 2 P=0.0008		3 vs 4 P=0.3076
	Sample #	1	2	3	4
		dg(Centromere) Normalized to tub1+
	Genotype:	mat3M::ade6+ atf1Δ
		atf1	atf1	atf1(10A/I)	atf1(10A/I)
	Temp.	30℃	37℃	30℃	37℃
	Repeat #1	5.40953	5.95904	5.57509	5.08152
	Repeat #2	5.35048	5.50495	5.63259	5.28967
	Repeat #3	5.81544	5.35445	5.46933	5.96071
	mean	5.52515	5.60615	5.559	5.44397
	SD	0.253122	0.314744	0.0828091	0.459452
	P value	1 vs 2 P=0.7458		3 vs 4 P=0.6915
