# Supplementary material for: Heat stress-induced activation of MAPK pathway attenuates Atf1-dependent epigenetic inheritance of heterochromatin in fission yeast
Source: eLife. 2024 Jan 30;13:e90525. doi: 10.7554/eLife.90525 (PMC10863984; doi:10.7554/eLife.90525)
Supplement: Figure 4—figure supplement 1—source data 1. [file elife-90525-fig4-figsupp1-data1.xlsx]

## Sheet: Figure 4-figure supplement 1A
		Pull down	Genotype	Temp. (℃)	Raw measurement ratio (beads bound Atf1/WCE Atf1)	Normalized ratio (beads bound Atf1/WCE Atf1)
		GST	wild type	30	0.0291139	1
		GST-Clr3	wild type	30	0.0987805	3.3929
		GST-Clr3	wild type	37	0.194423	6.678
		GST-Clr4	wild type	30	0.089422	3.07145
		GST-Clr4	wild type	37	0.0867866	2.98093
		MBP	wild type	30	0.0270563	0.929324
		MBP-Clr6	wild type	30	0.427046	14.6681
		MBP-Clr6	wild type	37	0.460098	15.8034

## Sheet: Figure 4-figure supplement 1B
Clr3-myc ChIP:		1	2	3	1	2	3	1	2	3	1	2	3	1	2	3
		mat2Pc(mat locus) Normalized to tub1+			CenH(mat locus) Normalized to tub1+			s2(mat locus) Normalized to tub1+			ade6+(mat locus) Normalized to tub1+			dg(Centromere)
	Genotype:	mat3M::ade6+			mat3M::ade6+			mat3M::ade6+			mat3M::ade6+			mat3M::ade6+
		no tag (30℃)	WT (30℃)	WT (37℃)	no tag (30℃)	WT (30℃)	WT (37℃)	no tag (30℃)	WT (30℃)	WT (37℃)	no tag (30℃)	WT (30℃)	WT (37℃)	no tag (30℃)	WT (30℃)	WT (37℃)
	Repeat #1	0.841288	1.41129	0.894632	0.930263	1.9296	2.33236	0.53689	3.32439	2.19121	1.1376	2.74904	1.22608	0.277286	0.916737	0.883185
	Repeat #2	1.31513	1.68513	1.26847	1.4041	2.70344	2.80619	1.01073	3.79823	2.56505	1.21144	2.52287	1.99992	0.274513	0.907569	0.974353
	Repeat #3	0.999495	1.4567	1.04004	1.06712	1.92661	2.13271	0.768153	2.88665	2.12544	1.22469	2.91738	1.49194	0.43715	1.07021	1.03699
	mean	1.05197	1.5177	1.06771	1.13383	2.18655	2.42375	0.771924	3.33643	2.2939	1.19124	2.72977	1.57264	0.32965	0.964837	0.964842
	SD	0.241238	0.146759	0.188449	0.243861	0.44764	0.34592	0.236941	0.455907	0.237114	0.0469268	0.19796	0.393181	0.093108	0.0913668	0.0773421
	P value		2 vs 3 P=0.0310			2 vs 3 P=0.5079			2 vs 3 P=0.0246			2 vs 3 P=0.0104			2 vs 3 P=1

## Sheet: Figure 4-figure supplement 1C
3xFlag-Clr4 ChIP:		1	2	3	1	2	3	1	2	3	1	2	3	1	2	3
		mat2Pc(mat locus) Normalized to tub1+			CenH(mat locus) Normalized to tub1+			s2(mat locus) Normalized to tub1+			ade6+(mat locus) Normalized to tub1+			dg(Centromere)
	Genotype:	mat3M::ade6+			mat3M::ade6+			mat3M::ade6+			mat3M::ade6+			mat3M::ade6+
		no tag (30℃)	WT (30℃)	WT (37℃)	no tag (30℃)	WT (30℃)	WT (37℃)	no tag (30℃)	WT (30℃)	WT (37℃)	no tag (30℃)	WT (30℃)	WT (37℃)	no tag (30℃)	WT (30℃)	WT (37℃)
	Repeat #1	0.855184	2.62383	2.16807	0.851289	2.91371	2.58094	0.57658	1.7868	1.5672	0.823389	2.14994	2.24078	0.283185	1.03475	1.04669
	Repeat #2	0.9878	3.05645	2.80068	0.983905	3.04633	3.11355	1.1092	2.51941	2.39982	1.35601	2.98256	2.77339	0.184222	1.0758	1.16805
	Repeat #3	1.20739	2.74611	2.34959	1.204	2.99831	2.70879	0.965001	2.01789	1.82684	1.17972	2.33383	2.41285	0.150043	1.98884	1.61886
	mean	1.01679	2.80879	2.43945	1.01306	2.98612	2.80109	0.883593	2.10803	1.93129	1.11971	2.48878	2.47567	0.205817	1.36646	1.27787
	SD	0.177882	0.223017	0.325739	0.178153	0.0671432	0.278046	0.275482	0.374534	0.426021	0.271333	0.437401	0.271809	0.0691479	0.539388	0.30148
	P value		2 vs 3 P=0.1804			2 vs 3 P=0.3253			2 vs 3 P=0.6181			2 vs 3 P=0.9670			2 vs 3 P=0.8161

## Sheet: Figure 4-figure supplement 1D
Clr6-13myc ChIP:		1	2	3	1	2	3	1	2	3	1	2	3	1	2	3
		mat2Pc(mat locus) Normalized to tub1+			CenH(mat locus) Normalized to tub1+			s2(mat locus) Normalized to tub1+			ade6+(mat locus) Normalized to tub1+			dg(Centromere)
	Genotype:	mat3M::ade6+			mat3M::ade6+			mat3M::ade6+			mat3M::ade6+			mat3M::ade6+
		no tag (30℃)	WT (30℃)	WT (37℃)	no tag (30℃)	WT (30℃)	WT (37℃)	no tag (30℃)	WT (30℃)	WT (37℃)	no tag (30℃)	WT (30℃)	WT (37℃)	no tag (30℃)	WT (30℃)	WT (37℃)
	Repeat #1	0.365114	0.617736	0.757748	0.297843	0.656391	0.673005	0.327191	0.90268	0.884657	0.390706	0.859093	0.67297	0.591419	0.663095	0.633761
	Repeat #2	0.44909	0.959815	0.93203	0.366347	0.85736	0.827796	0.402445	1.1103	1.08813	0.480568	1.15668	0.827753	0.585505	0.656464	0.627424
	Repeat #3	0.572564	0.98329	1.0555	0.489822	0.930835	0.95127	0.52592	1.13377	1.2116	0.604043	1.18016	1.15123	0.720857	0.751816	0.762776
	mean	0.462256	0.853614	0.915094	0.384671	0.814862	0.817357	0.418519	1.04892	1.06146	0.491772	1.06531	0.883984	0.632594	0.690458	0.674654
	SD	0.10435	0.204613	0.149599	0.0972922	0.142072	0.139426	0.100335	0.127187	0.165096	0.107109	0.178976	0.244037	0.0764956	0.0532408	0.0763819
	P value		2 vs 3 P=0.6960			2 vs 3 P=0.9837			2 vs 3 P=0.9220			2 vs 3 P=0.3580			2 vs 3 P=0.7834
