# Supplementary material for: Heat stress-induced activation of MAPK pathway attenuates Atf1-dependent epigenetic inheritance of heterochromatin in fission yeast
Source: eLife. 2024 Jan 30;13:e90525. doi: 10.7554/eLife.90525 (PMC10863984; doi:10.7554/eLife.90525)
Supplement: Figure 4—figure supplement 2—source data 6. [file elife-90525-fig4-figsupp2-data6.xls]

## Sheet: Figure 4-figure supplement 2B
ChIP: Pcr1-3xFlag		1	2	3	4	5	6	7	8	9	10
		s1 (mat locus) Normalized to tub1+
	Genotype:	mat3M::ade6+ ade6-DN/N pcr1-3xFlag
		no tag	wt		atf1Δ		atf1Δ Psty1-atf1		atf1Δ Psty1-atf1(10A/I)		atf1Δ Psty1-atf1(10D/E)
	Temp.	30℃	30℃	37℃	30℃	37℃	30℃	37℃	30℃	37℃	30℃
	Repeat #1	0.642246	1.03366	1.27374	1.32939	1.54859	1.32233	1.23343	1.60848	1.32243	1.23835
	Repeat #2	0.42599	1.31741	1.35748	1.41314	1.33233	1.50608	1.31718	1.42222	1.40618	1.3221
	Repeat #3	0.520425	1.5057	1.34541	1.10324	1.12226	1.29536	1.30547	1.28869	1.39368	1.31034
	mean	0.529554	1.28559	1.32554	1.28192	1.33439	1.37459	1.28536	1.43979	1.3741	1.29026
	SD	0.108417	0.237619	0.0452697	0.160309	0.213169	0.114669	0.0453487	0.160617	0.0451753	0.045339
	P value		2 vs 3 P=0.7890		4 vs 5 P=0.7505		6 vs 7 P=0.2783		8 vs 9 P=0.5327
			2 vs 6 P=0.5904				3 vs 7 P=0.3384		3 vs 9 P=0.2589
			2 vs 8 P=0.4044
		1	2	3	4	5	6	7	8	9	10
		s2 (mat locus) Normalized to tub1+
	Genotype:	mat3M::ade6+ ade6-DN/N pcr1-3xFlag
		no tag	wt		atf1Δ		atf1Δ Psty1-atf1		atf1Δ Psty1-atf1(10A/I)		atf1Δ Psty1-atf1(10D/E)
	Temp.	30℃	30℃	37℃	30℃	37℃	30℃	37℃	30℃	37℃	30℃
	Repeat #1	0.468509	1.35993	1.32	1.55566	1.67485	1.3486	1.35969	1.33474	1.2487	1.36462
	Repeat #2	0.520566	1.51103	1.46667	1.57295	1.49428	1.49844	1.51077	1.48304	1.38744	1.51624
	Repeat #3	0.303329	1.39379	1.44943	1.39571	1.59704	1.2812	1.29354	1.56581	1.5702	1.399
	mean	0.430801	1.42158	1.41203	1.50811	1.58872	1.37608	1.388	1.4612	1.40211	1.42662
	SD	0.113421	0.079292	0.0801668	0.0977182	0.0905732	0.111195	0.11135	0.117073	0.161255	0.0794949
	P value		2 vs 3 P=0.8905		4 vs 5 P=0.3538		6 vs 7 P=0.9020		8 vs 9 P=0.6346
			2 vs 6 P=0.5948				3 vs 7 P=0.7767		3 vs 9 P=0.9286
			2 vs 8 P=0.6529
		1	2	3	4	5	6	7	8	9	10
		SPCC320.03 (euchromatin locus) Normalized to tub1+
	Genotype:	mat3M::ade6+ ade6-DN/N pcr1-3xFlag
		no tag	wt		atf1Δ		atf1Δ Psty1-atf1		atf1Δ Psty1-atf1(10A/I)		atf1Δ Psty1-atf1(10D/E)
	Temp.	30℃	30℃	37℃	30℃	37℃	30℃	37℃	30℃	37℃	30℃
	Repeat #1	0.463355	2.34497	2.90548	1.84404	1.86302	2.33376	3.34474	2.02006	3.23496	2.34961
	Repeat #2	0.367498	2.24911	2.80962	1.54819	1.96717	2.2379	3.24888	2.2242	3.1391	2.25375
	Repeat #3	0.376114	2.00184	3.07549	1.78448	1.70391	2.29037	3.32505	2.29979	3.2127	2.33003
	mean	0.402322	2.19864	2.9302	1.72557	1.8447	2.28735	3.30622	2.18135	3.19559	2.31113
	SD	0.0530315	0.177044	0.134648	0.15648	0.132582	0.0480004	0.0506263	0.144706	0.0501675	0.0506476
	P value		2 vs 3 P=0.0047		4 vs 5 P=0.3713		6 vs 7 P=0.0001		8 vs 9 P=0.0003
			2 vs 6 P=0.4494				3 vs 7 P=0.0106		3 vs 9 P=0.0329
			2 vs 8 P=0.9021
