# Supplementary material for: Heat stress-induced activation of MAPK pathway attenuates Atf1-dependent epigenetic inheritance of heterochromatin in fission yeast
Source: eLife. 2024 Jan 30;13:e90525. doi: 10.7554/eLife.90525 (PMC10863984; doi:10.7554/eLife.90525)
Supplement: Figure 4—source data 1. [file elife-90525-fig4-data1.xlsx]

## Sheet: Figure4B
		Swi6 ChIP:
			mat2Pc(mat locus) Normalized to tub1+			CenH(mat locus) Normalized to tub1+			s2(mat locus) Normalized to tub1+			ade6+(mat locus) Normalized to tub1+			dg(Centromere)
		Genotype:	mat3M::ade6+			mat3M::ade6+			mat3M::ade6+			mat3M::ade6+			mat3M::ade6+
			clr4Δ (30℃)	WT (30℃)	WT (37℃)	clr4Δ (30℃)	WT (30℃)	WT (37℃)	clr4Δ (30℃)	WT (30℃)	WT (37℃)	clr4Δ (30℃)	WT (30℃)	WT (37℃)	clr4Δ (30℃)	WT (30℃)	WT (37℃)
		Repeat #1	0.464496	7.30934	4.84813	1.04935	8.02814	8.08018	1.05143	7.94011	2.56202	0.951427	5.31918	1.27051	0.578145	7.08064	5.889
		Repeat #2	0.950561	6.27279	3.27271	0.817869	6.70314	5.84351	0.619891	5.40405	1.88141	0.822884	3.2473	1.39987	0.921112	5.37899	5.84027
		Repeat #3	0.991368	5.81286	2.90211	0.77809	7.26392	5.21555	0.560244	4.64621	3.09785	0.57492	4.66154	2.61863	0.652361	4.29932	7.03854
		mean	0.802141	6.465	3.67431	0.88177	7.33173	6.37975	0.743857	5.99679	2.51376	0.783077	4.40934	1.763	0.717206	5.58632	6.25594
		SD	0.293121	0.766533	1.0333	0.146485	0.665098	1.50572	0.268035	1.72509	0.609656	0.191384	1.05872	0.743815	0.180445	1.4022	0.678193
		P value		2 vs 3 P=0.0198			2 vs 3 P=0.3872			2 vs 3 P=0.0300			2 vs 3 P=0.0240			2 vs 3 P=0.4979
