# Supplementary material for: Heat stress-induced activation of MAPK pathway attenuates Atf1-dependent epigenetic inheritance of heterochromatin in fission yeast
Source: eLife. 2024 Jan 30;13:e90525. doi: 10.7554/eLife.90525 (PMC10863984; doi:10.7554/eLife.90525)
Supplement: Figure 5—figure supplement 1—source data 1. [file elife-90525-fig5-figsupp1-data1.xls]

## Sheet: Figure 5-figure supplement 1C
		RT-qPCR:		Repeat #1:	Repeat #2:	Repeat #3:	mean	SD	P value
		Genotype:	Temp.(℃)	mRNA levels (ade6+/act1+)	mRNA levels (ade6+/act1+)	mRNA levels (ade6+/act1+)
		kΔ::ade6+	30	1	1	1	1	0
		kΔ::ade6+ wis1-DD	30	1.23	1.47	2.13	1.61	0.466047	0.0801
		kΔ::ade6+ lys1::Padh11-wis1-DD	30	0.94	1.03	1.12	1.03	0.09	0.5946
		kΔ::ade6+ wis1-DD lys1::Padh11-wis1-DD	30	13.21	9.87	11.45	11.51	1.67081	0.0004

## Sheet: Figure 5-figure supplement 1F
H3K9me3 ChIP:		mat2Pc(mat locus) Normalized to tub1+				ade6+(mat locus) Normalized to tub1+				s2(mat locus) Normalized to tub1+				dg(Centromere) Normalized to tub1+
	Genotype:	kΔ::ade6+ ade6-DN/N				kΔ::ade6+ ade6-DN/N				kΔ::ade6+ ade6-DN/N				kΔ::ade6+ ade6-DN/N
		wt	wis1-DD	lys1::wis1-DD	2x wis1-DD	wt	wis1-DD	lys1::wis1-DD	2x wis1-DD	wt	wis1-DD	lys1::wis1-DD	2x wis1-DD	wt	wis1-DD	lys1::wis1-DD	2x wis1-DD
	Temp.	30℃	30℃	30℃	30℃	30℃	30℃	30℃	30℃	30℃	30℃	30℃	30℃	30℃	30℃	30℃	30℃
	Repeat #1	5.17519	4.09925	4.35706	2.03978	8.4588	6.0132	6.77242	3.72458	3.66663	2.96683	3.38264	1.40045	5.69938	5.77176	5.42058	6.07594
	Repeat #2	5.81174	4.60345	4.49298	2.29067	9.49923	6.25282	7.60543	3.48271	4.11763	3.33175	3.79871	1.57271	6.1004	6.48169	6.08732	6.22328
	Repeat #3	4.72243	3.94648	3.9043	1.58702	8.00604	5.56043	6.71966	3.27182	4.21387	3.51406	3.92988	0.947689	5.55294	5.63422	6.23985	5.97582
	mean	5.23645	4.2164	4.25145	1.97249	8.65469	5.94215	7.0325	3.49304	3.99938	3.27088	3.70375	1.30695	5.78424	5.96256	5.91592	6.09168
	SD	0.547233	0.343795	0.308224	0.356621	0.765629	0.351618	0.496869	0.226558	0.292155	0.27865	0.285711	0.322829	0.283426	0.454809	0.435698	0.124481
	P value		0.0522	0.0532	0.001		0.0051	0.0051	0.0004		0.0353	0.2784	0.0004		0.5953	0.6835	0.6835
Swi6 ChIP:		mat2Pc(mat locus) Normalized to tub1+				ade6+(mat locus) Normalized to tub1+				s2(mat locus) Normalized to tub1+				dg(Centromere) Normalized to tub1+
	Genotype:	kΔ::ade6+ ade6-DN/N				kΔ::ade6+ ade6-DN/N				kΔ::ade6+ ade6-DN/N				kΔ::ade6+ ade6-DN/N
		wt	wis1-DD	lys1::wis1-DD	2x wis1-DD	wt	wis1-DD	lys1::wis1-DD	2x wis1-DD	wt	wis1-DD	lys1::wis1-DD	2x wis1-DD	wt	wis1-DD	lys1::wis1-DD	2x wis1-DD
	Temp.	30℃	30℃	30℃	30℃	30℃	30℃	30℃	30℃	30℃	30℃	30℃	30℃	30℃	30℃	30℃	30℃
	Repeat #1	3.20357	3.12762	3.38544	2.06815	4.48717	3.8008	4.04157	2.75296	3.295	2.41102	2.9952	1.62882	3.8106	3.11632	3.962	3.92051
	Repeat #2	3.46953	3.26124	3.15077	1.94846	4.15702	3.26322	3.91061	2.14049	3.47542	2.4565	2.98953	1.9305	3.21163	3.82625	3.92873	3.06785
	Repeat #3	3.599	3.02305	3.08087	1.46358	3.8826	3.59623	3.437	2.14839	3.09044	2.80645	2.39063	1.82426	3.66416	3.97878	3.78127	3.82038
	mean	3.42403	3.13731	3.20569	1.82673	4.1756	3.55341	3.79639	2.34728	3.28695	2.55799	2.79179	1.79453	3.56213	3.64045	3.89066	3.60291
	SD	0.201604	0.11939	0.159539	0.320139	0.302712	0.271334	0.318056	0.351348	0.192616	0.216372	0.347424	0.153017	0.312251	0.460272	0.0961917	0.466076
	P value		0.1014	0.2153	0.0019		0.0569	0.209	0.0024		0.0121	0.097	0.0005		0.8193	0.8193	0.9059
