# Supplementary material for: Heat stress-induced activation of MAPK pathway attenuates Atf1-dependent epigenetic inheritance of heterochromatin in fission yeast
Source: eLife. 2024 Jan 30;13:e90525. doi: 10.7554/eLife.90525 (PMC10863984; doi:10.7554/eLife.90525)
Supplement: Figure 5—source data 1. [file elife-90525-fig5-data1.xls]

## Sheet: Figure 5C
			Repeat #1:	Repeat #2:	Repeat #3:	mean	SD	P value
	Genotype:	Temp.(℃)	mRNA levels (ade6+/act1+)	mRNA levels (ade6+/act1+)	mRNA levels (ade6+/act1+)
1	kΔ::ade6+	30	1	1	1	1	0
2	kΔ::ade6+ wis1-DD lys1::Padh11-wis1-DD	30	9.59	8.34	10.21	9.38	0.952523	1 vs 2 P=0.0001
3	kΔ::ade6+ wis1-DD lys1::Padh11-wis1-DD sty1(T97A)	30	5.35	4.91	6.03	5.43	0.564269	2 vs 3 P=0.0035
4	kΔ::ade6+ wis1-DD lys1::Padh11-wis1-DD sty1(T97A) + 5μM 3-BrB-PP1	30	1.34	1.23	1.42	1.33	0.0953939	2 vs 4 P=0.0001
5	kΔ::ade6+ wis1-DD lys1::Padh11-wis1-DD sty1Δ	30	1.22	1.17	1.25	1.21333	0.0404145	2 vs 5 P=0.0001

## Sheet: Figure 5F
			1	2	3	4	1	2	3	4	1	2	3	4	1	2	3	4
	H3K9me3:		mat2Pc(mat locus) Normalized to tub1+				ade6+(mat locus) Normalized to tub1+				s2(mat locus) Normalized to tub1+				dg(Centromere) Normalized to tub1+
		Genotype:		kΔ::ade6+ ade6-DN/N 2x wis1-DD				kΔ::ade6+ ade6-DN/N 2x wis1-DD				kΔ::ade6+ ade6-DN/N 2x wis1-DD				kΔ::ade6+ ade6-DN/N 2x wis1-DD
			wt	wt	sty1-T97A + 3BrB-PP1	sty1Δ	wt	wt	sty1-T97A + 3BrB-PP1	sty1Δ	wt	wt	sty1-T97A + 3BrB-PP1	sty1Δ	wt	wt	sty1-T97A + 3BrB-PP1	sty1Δ
		Temp.	25℃	25℃	25℃	25℃	25℃	25℃	25℃	25℃	25℃	25℃	25℃	25℃	25℃	25℃	25℃	25℃
		Repeat #1	4.74456	2.5528	4.98961	4.05076	9.34805	4.94805	9.75909	9.03099	4.66663	2.25913	4.21126	4.46317	8.69938	9.24451	8.07194	9.08374
		Repeat #2	4.32344	2.26805	4.30485	4.56601	9.44456	4.24454	9.50595	9.34532	4.12746	2.33342	4.23342	4.46666	8.92564	8.97078	8.8982	8.91
		Repeat #3	4.99637	2.25877	4.39304	4.54865	8.00604	4.45355	9.00495	9.24567	4.43764	2.52336	4.62365	4.89746	9.37821	9.75786	8.68802	9.201
		mean	4.68812	2.35987	4.5625	4.38847	8.93288	4.54871	9.42333	9.20733	4.41058	2.37197	4.35611	4.6091	9.00108	9.32438	8.55272	9.06491
		SD	0.34	0.167148	0.372505	0.292593	0.80412	0.361279	0.3838	0.160633	0.2706	0.136267	0.231964	0.249739	0.345645	0.399571	0.429429	0.14641
		P value	1 vs 2 P=0.0004		2 vs 3 P=0.0007	2 vs 4 P=0.0005	1 vs 2 P=0.001		2 vs 3 P=0.0001	2 vs 4 P=0.0001	1 vs 2 P=0.0003		2 vs 3 P=0.0002	2 vs 4 P=0.0002	1 vs 2 P=0.3489		2 vs 3 P=0.0849	2 vs 4 P=0.3505
		1	2	3	4	1	2	3	4	1	2	3	4	1	2	3	4
	Swi6:		mat2Pc(mat locus) Normalized to tub1+				ade6+(mat locus) Normalized to tub1+				s2(mat locus) Normalized to tub1+				dg(Centromere) Normalized to tub1+
		Genotype:		kΔ::ade6+ ade6-DN/N 2x wis1-DD				kΔ::ade6+ ade6-DN/N 2x wis1-DD				kΔ::ade6+ ade6-DN/N 2x wis1-DD				kΔ::ade6+ ade6-DN/N 2x wis1-DD
			wt	wt	sty1-T97A + 3BrB-PP1	sty1Δ	wt	wt	sty1-T97A + 3BrB-PP1	sty1Δ	wt	wt	sty1-T97A + 3BrB-PP1	sty1Δ	wt	wt	sty1-T97A + 3BrB-PP1	sty1Δ
		Temp.	25℃	25℃	25℃	25℃	25℃	25℃	25℃	25℃	25℃	25℃	25℃	25℃	25℃	25℃	25℃	25℃
		Repeat #1	3.76695	2.32772	3.91597	3.43565	5.90594	2.93657	5.6373	5.03444	5.941	3.02964	5.66099	5.62882	4.35814	5.55533	4.64422	4.75646
		Repeat #2	3.53265	1.99342	3.68167	3.60135	5.3222	2.05283	5.45356	5.4507	5.44455	2.67465	5.04746	5.73746	4.63494	5.83213	4.52102	4.63326
		Repeat #3	3.60928	2.09309	3.36575	3.58141	6.0694	2.53481	5.21316	5.91308	5.08656	2.86475	5.39654	5.02746	4.53629	5.27169	4.8292	4.34414
		mean	3.63629	2.13807	3.65447	3.53947	5.76585	2.50807	5.43467	5.46607	5.4907	2.85635	5.36833	5.46458	4.50979	5.55305	4.66481	4.57796
		SD	0.119463	0.17163	0.276115	0.0904635	0.392805	0.442475	0.212701	0.439526	0.429086	0.177647	0.307734	0.382434	0.140289	0.280226	0.155123	0.211654
		P value	1 vs 2 P=0.0002		2 vs 3 P=0.0013	2 vs 4 P=0.0002	1 vs 2 P=0.0007		2 vs 3 P=0.0005	2 vs 4 P=0.0012	1 vs 2 P=0.0006		2 vs 3 P=0.0003	2 vs 4 P=0.0004	1 vs 2 P=0.0045		2 vs 3 P=0.0086	2 vs 4 P=0.086
