# Supplementary material for: Heat stress-induced activation of MAPK pathway attenuates Atf1-dependent epigenetic inheritance of heterochromatin in fission yeast
Source: eLife. 2024 Jan 30;13:e90525. doi: 10.7554/eLife.90525 (PMC10863984; doi:10.7554/eLife.90525)
Supplement: Figure 6—figure supplement 3—source data 1. [file elife-90525-fig6-figsupp3-data1.xls]

## Sheet: Figure 6-figure supplement 3C
			Repeat #1:	Repeat #2:	Repeat #3:	Mean	SD	P value
	Genotype:	Temp.(℃)	mRNA levels (ade6+/act1+)	mRNA levels (ade6+/act1+)	mRNA levels (ade6+/act1+)
1	mat3M::ade6+ atf1Δ Psty1-atf1	30	1	1	1	1	0
2	mat3M::ade6+ atf1Δ Psty1-atf1	37	9.33	9.77	8.75	9.28333	0.511599	1 vs 2 P=0.0001
3	mat3M::ade6+ atf1Δ Psty1-atf1(10A/I)	30	1.01	1.02	1.03	1.02	0.01
4	mat3M::ade6+ atf1Δ Psty1-atf1(10A/I)	37	5.33	5.03	4.55	4.97	0.393446	2 vs 4 P=0.0003
5	mat3M::ade6+ atf1Δ Psty1-atf1(10D/E)	30	1.02	1.07	1.09	1.06	0.0360555
6	mat3M::ade6+ atf1Δ Psty1-atf1(11A/I)	30	1.02	1.01	0.98	1.00333	0.0208167
7	mat3M::ade6+ atf1Δ Psty1-atf1(11A/I)	37	5.36	5.34	4.25	4.98333	0.635164	2 vs 7 P=0.0008
8	mat3M::ade6+ atf1Δ Psty1-atf1(11D/E)	30	1.03	1.04	1.05	1.04	0.01
9	mat3M::ade6+ atf1Δ Psty1-atf1(S438A)	30	1.01	1.02	1.05	1.02667	0.0208167
10	mat3M::ade6+ atf1Δ Psty1-atf1(S438A)	37	9.09	9.49	10.01	9.53	0.461303	2 vs 10 P=0.5687
11	mat3M::ade6+ atf1Δ Psty1-atf1(S438D)	30	1.01	1.03	0.96	1	0.0360555
12	mat3M::ade6+ atf1Δ Psty1-atf1(S438D)	37	9.01	9.46	9.92	9.46333	0.455009	2 vs 12 P=0.6725
