# Supplementary material for: Heat stress-induced activation of MAPK pathway attenuates Atf1-dependent epigenetic inheritance of heterochromatin in fission yeast
Source: eLife. 2024 Jan 30;13:e90525. doi: 10.7554/eLife.90525 (PMC10863984; doi:10.7554/eLife.90525)
Supplement: Figure 6—source data 1. [file elife-90525-fig6-data1.xls]

## Sheet: Figure 6C
			Repeat #1:	Repeat #2:	Repeat #3:	Mean	SD	P value
Sample #	Strain Genotype:	Temp.(℃)	mRNA levels (ade6+/act1+)	mRNA levels (ade6+/act1+)	mRNA levels (ade6+/act1+)
1	mat3M::ade6+ atf1Δ Psty1-atf1	30	1.02668	0.913614	1.05971	1	0.07661
2	mat3M::ade6+ atf1Δ Psty1-atf1(10A/I)	30	0.678643	0.614395	0.454767	0.582602	0.1153	1 vs 2 P=0.0064
3	mat3M::ade6+ atf1Δ Psty1-atf1(10D/E)	30	2.7212	2.20597	2.23468	2.38728	0.2895	1 vs 3 P=0.0013
4	mat3M::ade6+ atf1Δ Psty1-atf1(4A/I)	30	1.08013	0.891206	1.13145	1.03426	0.1265	1 vs 4 P=0.7088	2 vs 4 P=0.0103
5	mat3M::ade6+ atf1Δ Psty1-atf1(4D/E)	30	1.44436	1.25481	1.15503	1.28473	0.147	1 vs 5 P=0.0409	3 vs 5 P=0.0042
6	mat3M::ade6+ atf1Δ Psty1-atf1(6A/I)	30	1.16492	1.07351	0.943019	1.06048	0.1115	1 vs 6 P=0.4820	2 vs 6 P=0.0067	4 vs 6 P=0.8010
7	mat3M::ade6+ atf1Δ Psty1-atf1(6D/E)	30	1.67939	1.71764	1.68494	1.69399	0.02067	1 vs 7 P=0.0001	3 vs 7 P=0.0144	5 vs 7 P=0.0088
8	mat3M::ade6+ atf1Δ Psty1-atf1	37	2.02877	2.00199	2.04406	2.02494	0.02129
9	mat3M::ade6+ atf1Δ Psty1-atf1(10A/I)	37	1.2382	1.29202	1.24737	1.2592	0.02879	8 vs 9 P=0.0001
10	mat3M::ade6+ atf1Δ Psty1-atf1(10D/E)	37	3.80922	3.29499	3.07905	3.39442	0.3751	8 vs 10 P=0.0032
11	mat3M::ade6+ atf1Δ Psty1-atf1(4A/I)	37	1.76363	1.80686	1.64389	1.73813	0.08442	8 vs 11 P=0.0047	9 vs 11 P=0.0007
12	mat3M::ade6+ atf1Δ Psty1-atf1(4D/E)	37	1.8779	1.91525	1.74511	1.84609	0.08942	8 vs 12 P=0.0280	10 vs 12 P=0.0022
13	mat3M::ade6+ atf1Δ Psty1-atf1(6A/I)	37	1.52562	1.39599	1.45361	1.4584	0.06495	8 vs 13 P=0.0001	9 vs 13 P=0.0083	11 vs 13 P=0.0104
14	mat3M::ade6+ atf1Δ Psty1-atf1(6D/E)	37	2.07226	2.21693	2.25834	2.18251	0.05641	8 vs 14 P=0.0525	10 vs 14 P=0.0056	12 vs 14 P=0.0117
