# Supplementary material for: Heat stress-induced activation of MAPK pathway attenuates Atf1-dependent epigenetic inheritance of heterochromatin in fission yeast
Source: eLife. 2024 Jan 30;13:e90525. doi: 10.7554/eLife.90525 (PMC10863984; doi:10.7554/eLife.90525)
Supplement: Figure 7—source data 1. [file elife-90525-fig7-data1.xlsx]

## Sheet: Figure 7B
	anti-Flag ChIP:	ade6+(mat locus) Normalized to tub1+
	Genotype:	mat3M::4xtetO-ade6+ ade6-DN/N
		wt		Padh81-swi6ΔCD		Padh81-TetR		Padh81-TetR-swi6(ΔCD)
	Temp.	30℃	37℃	30℃	37℃	30℃	37℃	30℃	37℃
	Repeat #1	0.462232	0.469016	0.492668	0.430787	1.28306	1.26954	1.23124	1.2167
	Repeat #2	0.439121	0.445565	0.408034	0.409248	1.3189	1.50606	1.56968	1.35586
	Repeat #3	0.568546	0.47689	0.605981	0.529868	1.57816	1.56153	1.51442	1.49654
	mean	0.489966	0.463824	0.502228	0.456634	1.39337	1.44571	1.43845	1.35636
	SD	0.069026	0.016295	0.0993191	0.0643303	0.16103	0.15507	0.181561	0.139921

## Sheet: Figure 7C
		mat3M::4xtetO-ade6+ ade6-DN/N
	Genotype:	wt		Padh81-swi6ΔCD		Padh81-TetR		Padh81-TetR-swi6(ΔCD)
	Temp.(℃)	30℃	37℃	30℃	37℃	30℃	37℃	30℃	37℃
	White	0	0	0	0	0	0	0	0
	Variegated	0	54	0	69	0	72	0	12
	Red	645	606	633	597	614	567	667	801
	White	0	0	0	0	0	0	0	0
	Variegated	0	0.0818	0	0.1036	0	0.1127	0	0.0148
	Red	1	0.9182	1	0.8964	1	0.8873	1	0.9852

## Sheet: Figure 7D
	RT-qPCR:		Repeat #1:	Repeat #2:	Repeat #3:	mean	SD	P value
	Genotype:	Temp.(℃)	mRNA levels (ade6+/act1+)	mRNA levels (ade6+/act1+)	mRNA levels (ade6+/act1+)
1	mat3M::4xtetO-ade6+	30	1	1	1	1	0
2	mat3M::4xtetO-ade6+	37	7.37141	8.57571	8.10855	8.01856	0.607176
3	mat3M::4xtetO-ade6+ lys1Δ::Padh81-swi6ΔCD	30	2.06462	2.15431	2.27108	2.16334	0.103526
4	mat3M::4xtetO-ade6+ lys1Δ::Padh81-swi6ΔCD	37	10.5747	10.0947	11.6322	10.7672	0.786602	2 vs 4 P=0.0001
5	mat3M::4xtetO-ade6+ lys1Δ::Padh81-TetR-2xFlag	30	1.60881	1.80786	1.76969	1.72879	0.105641
6	mat3M::4xtetO-ade6+ lys1Δ::Padh81-TetR-2xFlag	37	10.3149	9.81477	11.3464	10.492	0.781006	2 vs 6 P=0.0001
7	mat3M::4xtetO-ade6+ llys1Δ::Padh81-TetR-2xFlag-swi6ΔCD	30	0.828651	1.0172	0.911516	0.919122	0.0945028
8	mat3M::4xtetO-ade6+ llys1Δ::Padh81-TetR-2xFlag-swi6ΔCD	37	3.07424	3.01746	3.38166	3.15779	0.195948	2 vs 8 P=0.0002

## Sheet: Figure 7E
H3K9me3 ChIP:	Sample #	1	2	3	4	5	6	7	8	1	2	3	4	5	6	7	8	1	2	3	4	5	6	7	8	1	2	3	4	5	6	7	8
		mat2Pc(mat locus) Normalized to tub1+								CenH(mat locus) Normalized to tub1+								s2(mat locus) Normalized to tub1+								ade6+(mat locus) Normalized to tub1+
	Genotype:	mat3M::4xtetO-ade6+ ade6-DN/N								mat3M::4xtetO-ade6+ ade6-DN/N								mat3M::4xtetO-ade6+ ade6-DN/N								mat3M::4xtetO-ade6+ ade6-DN/N
		wt		Padh81-swi6ΔCD		Padh81-TetR		Padh81-TetR-swi6(ΔCD)		wt		Padh81-swi6ΔCD		Padh81-TetR		Padh81-TetR-swi6(ΔCD)		wt		Padh81-swi6ΔCD		Padh81-TetR		Padh81-TetR-swi6(ΔCD)		wt		Padh81-swi6ΔCD		Padh81-TetR		Padh81-TetR-swi6(ΔCD)
	Temp.	30℃	37℃	30℃	37℃	30℃	37℃	30℃	37℃	30℃	37℃	30℃	37℃	30℃	37℃	30℃	37℃	30℃	37℃	30℃	37℃	30℃	37℃	30℃	37℃	30℃	37℃	30℃	37℃	30℃	37℃	30℃	37℃
	Repeat #1	5.46797	4.0358	6.33472	4.84278	6.45292	3.64283	6.25543	5.00855	8.90912	8.66891	10.997	10.7768	10.5313	11.824	11.2585	10.3507	6.10381	4.63182	6.85792	4.55007	7.2684	4.52544	9.32786	9.32737	11.1911	9.03969	14.2759	9.82081	16.1197	10.9057	14.8242	16.2849
	Repeat #2	6.08156	4.84297	7.60166	5.81134	7.7435	4.3714	7.50652	6.01026	9.69095	10.4027	13.1964	12.9322	12.6376	13.1888	12.3102	12.4209	7.32457	5.55818	8.2295	5.46009	6.72208	5.43053	10.1934	9.19284	13.4293	10.8476	16.1311	11.785	18.3437	13.0869	17.789	18.5419
	Repeat #3	4.91593	4.91473	6.14468	5.6975	6.25933	4.53355	6.06777	4.85829	9.64185	8.40885	11.6671	11.4535	10.2154	11.4693	10.9507	10.0402	6.92069	4.49286	7.65218	6.41357	7.05034	4.88968	9.04802	9.04754	12.8553	8.7685	13.8477	9.52618	15.6361	10.5785	14.3795	15.7964
	mean	5.48849	4.59783	6.69369	5.45054	6.81859	4.18259	6.6099	5.29237	9.41397	9.16015	11.9535	11.7208	11.1281	12.1607	11.5065	10.9373	6.78302	4.89428	7.57987	5.47458	7.01361	4.94855	9.5231	9.18925	12.4919	9.55194	14.7516	10.3773	16.6998	11.5237	15.6642	16.8744
	SD	0.583087	0.488052	0.792051	0.529402	0.80683	0.474425	0.782137	0.626236	0.437902	1.0839	1.12733	1.10227	1.31677	0.907858	0.712844	1.29419	0.621916	0.579131	0.688645	0.931833	0.275007	0.455407	0.597143	0.139945	1.16253	1.13026	1.21377	1.22793	1.44398	1.36358	1.85352	1.46461
	P value	1 vs 2 P=0.1124		3 vs 4 P=0.0867		5 vs 6 P=0.0082		7 vs 8 P=0.0850		1 vs 2 P=0.7260		3 vs 4 P=0.8108		5 vs 6 P=0.3261		7 vs 8 P=0.5411		1 vs 2 P=0.0183		3 vs 4 P=0.0346		5 vs 6 P=0.0025		7 vs 8 P=0.3992		1 vs 2 P=0.0348		3 vs 4 P=0.0118		5 vs 6 P=0.0107		7 vs 8 P=0.4251
	Sample #	1	2	3	4	5	6	7	8
		dg(Centromere) Normalized to tub1+
	Genotype:	mat3M::4xtetO-ade6+ ade6-DN/N
		wt		Padh81-swi6ΔCD		Padh81-TetR		Padh81-TetR-swi6(ΔCD)
	Temp.	30℃	37℃	30℃	37℃	30℃	37℃	30℃	37℃
	Repeat #1	13.9292	14.5338	18.0186	17.7564	17.5083	18.5946	16.9429	17.9148
	Repeat #2	15.3221	15.9872	16.8205	16.532	16.2591	16.454	18.6372	19.7062
	Repeat #3	14.5113	14.0978	17.4781	17.2237	16.983	18.0367	16.4346	17.3773
	mean	14.5875	14.873	17.4391	17.1707	16.9168	17.6951	17.3382	18.3328
	SD	0.699581	0.989298	0.60002	0.613898	0.627214	1.11041	1.15328	1.21943
	P value	1 vs 2 P=0.7042		3 vs 4 P=0.6169		5 vs 6 P=0.3501		7 vs 8 P=0.3627
