# Supplementary material for: Heat stress-induced activation of MAPK pathway attenuates Atf1-dependent epigenetic inheritance of heterochromatin in fission yeast
Source: eLife. 2024 Jan 30;13:e90525. doi: 10.7554/eLife.90525 (PMC10863984; doi:10.7554/eLife.90525)
Supplement: Figure 8—source data 1. [file elife-90525-fig8-data1.xls]

## Sheet: Figure 8A
	Genotype:	mat3M::ade6+			mat3M::ade6+ epe1Δ			mat3M::ade6+ mst2Δ			mat3M::ade6+ leo1Δ
	Temp.(℃)	30℃	37℃		30℃	37℃		30℃	37℃		30℃	37℃
	White	0	0		0	5		0	0		0	0
	Variegated	0	72		0	20		0	105		0	98
	Red	622	708		590	555		620	860		755	878
	White	0	0		0	0.0086		0	0		0	0
	Variegated	0	0.0923		0	0.0345		0	0.1088		0	0.1004
	Red	1	0.9077		1	0.9569		1	0.8912		1	0.8996

## Sheet: Figure 8B
	RT-qPCR:		Repeat #1:	Repeat #2:	Repeat #3:	mean	SD	P value
Sample #	Genotype:	Temp.(℃)	mRNA levels (ade6+/act1+)	mRNA levels (ade6+/act1+)	mRNA levels (ade6+/act1+)
1	mat3M::ade6+	30	1	1	1	1	0
2	mat3M::ade6+	37	10.6698	9.32119	8.00279	9.33125	1.33352
3	mat3M::ade6+ epe1Δ	30	0.63478	0.886204	0.971302	0.830762	0.174978
4	mat3M::ade6+ epe1Δ	37	3.20999	2.86141	3.88899	3.32013	0.522568	2 vs 4 P=0.0019
5	mat3M::ade6+ mst2Δ	30	1.33628	0.987708	1.20266	1.17555	0.175862
6	mat3M::ade6+ mst2Δ	37	7.77906	7.43049	7.00115	7.40357	0.389651	2 vs 6 P=0.0741
7	mat3M::ade6+ leo1Δ	30	0.41541	0.0668346	0.373869	0.285371	0.190395
8	mat3M::ade6+ leo1Δ	37	8.43132	8.08274	7.58819	8.03408	0.423667	2 vs 8 P=0.1836

## Sheet: Figure 8C
	H3K9me3 ChIP:		mat2Pc(mat locus) Normalized to tub1+								CenH(mat locus) Normalized to tub1+								s2(mat locus) Normalized to tub1+								ade6+(mat locus) Normalized to tub1+
		Genotype:	mat3M::ade6+ ade6-DN/N								mat3M::ade6+ ade6-DN/N								mat3M::ade6+ ade6-DN/N								mat3M::ade6+ ade6-DN/N
			wt		epe1Δ		mst2Δ		leo1Δ		wt		epe1Δ		mst2Δ		leo1Δ		wt		epe1Δ		mst2Δ		leo1Δ		wt		epe1Δ		mst2Δ		leo1Δ
		Temp.	30℃	37℃	30℃	37℃	30℃	37℃	30℃	37℃	30℃	37℃	30℃	37℃	30℃	37℃	30℃	37℃	30℃	37℃	30℃	37℃	30℃	37℃	30℃	37℃	30℃	37℃	30℃	37℃	30℃	37℃	30℃	37℃
		Repeat #1	4.11518	3.14207	5.42842	5.16928	4.33472	3.49882	4.37214	3.48258	9.2509	11.4797	10.997	10.7768	10.5313	11.824	14.9434	13.7912	7.12827	4.43233	8.31026	7.77125	8.04306	4.16904	7.78845	5.5198	7.26132	4.42863	6.60789	6.27943	7.39447	4.2774	6.82627	5.15567
		Repeat #2	3.18151	2.2084	5.49475	4.2356	4.40104	2.56515	5.43847	2.5489	8.31723	10.546	10.0633	9.84313	10.5976	10.8903	10.0097	12.8575	6.1946	5.49866	7.37659	7.83757	7.10939	5.23537	6.85477	4.58612	5.32764	3.49496	6.67422	5.34576	6.46079	5.34373	5.8926	4.222
		Repeat #3	4.58843	2.50341	6.05269	5.76374	4.83321	2.90119	4.87494	3.88307	10.3148	11.7998	12.2617	11.0161	11.7424	12.1837	11.0869	15.3772	5.94803	5.17205	8.26594	6.66494	7.96802	6.07848	8.68412	3.26957	6.98137	3.93792	7.3678	7.00156	8.24483	5.8843	7.61129	3.74858
		mean	3.96171	2.61796	5.65862	5.05621	4.52299	2.98839	4.89518	3.30485	9.2943	11.2752	11.1073	10.5454	10.9571	11.6327	12.0134	14.0086	6.42363	5.03435	7.98426	7.42459	7.70682	5.16096	7.77578	4.4585	6.52344	3.95384	6.88331	6.20892	7.3667	5.16848	6.77672	4.37542
		SD	0.715907	0.477261	0.342883	0.77032	0.270697	0.472906	0.533451	0.684611	0.999471	0.651454	1.10331	0.619808	0.680891	0.6676	2.59403	1.27383	0.622566	0.546337	0.526729	0.658708	0.518752	0.956892	0.914739	1.13053	1.04501	0.467041	0.420895	0.830154	0.892343	0.81766	0.860419	0.715984
		P value	1 vs 2 P=0.0538		3 vs 4 P=0.2836		5 vs 6 P=0.0082		7 vs 8 P=0.0337		1 vs 2 P=0.0452		3 vs 4 P=0.4847		5 vs 6 P=0.2871		7 vs 8 P=0.2978		1 vs 2 P=0.0439		3 vs 4 P=0.3145		5 vs 6 P=0.0155		7 vs 8 P=0.0168		1 vs 2 P=0.0177		3 vs 4 P=0.2778		5 vs 6 P=0.0347		7 vs 8 P=0.0206
			dg(Centromere) Normalized to tub1+
		Genotype:	mat3M::ade6+ ade6-DN/N
			wt		epe1Δ		mst2Δ		leo1Δ
		Temp.	30℃	37℃	30℃	37℃	30℃	37℃	30℃	37℃
		Repeat #1	6.74654	7.70884	7.84349	7.63687	7.70832	7.13818	8.23242	8.60401
		Repeat #2	6.10222	6.06451	6.19917	8.99254	6.064	8.49385	7.5881	6.95969
		Repeat #3	7.57637	8.65702	9.80824	8.5762	8.65645	8.01617	9.24501	10.6623
		mean	6.80838	7.47679	7.9503	8.40187	7.47626	7.88273	8.35518	8.742
		SD	0.739017	1.31174	1.80691	0.694448	1.31171	0.687618	0.835249	1.85516
		P value	1 vs 2 P=0.4848		3 vs 4 P=0.7068		5 vs 6 P=0.6593		7 vs 8 P=0.7584

## Sheet: Figure 8D
Epe1-3HA ChIP:	Sample #	1	2	3	1	2	3	1	2	3	1	2	3	1	2	3
		mat2Pc(mat locus) Normalized to tub1+			CenH(mat locus) Normalized to tub1+			s2(mat locus) Normalized to tub1+			ade6+(mat locus) Normalized to tub1+			dg(Centromere)
	Genotype:	mat3M::ade6+			mat3M::ade6+			mat3M::ade6+			mat3M::ade6+			mat3M::ade6+
		no tag (30℃)	WT (30℃)	WT (37℃)	no tag (30℃)	WT (30℃)	WT (37℃)	no tag (30℃)	WT (30℃)	WT (37℃)	no tag (30℃)	WT (30℃)	WT (37℃)	no tag (30℃)	WT (30℃)	WT (37℃)
	Repeat #1	1.97218	4.90059	5.48904	1	2.12125	2.66607	1	3.84544	2.96271	1	3.45747	2.92498	1.93769	4.96249	6.98726
	Repeat #2	1.12415	3.79334	3.12875	0.57	1.60911	1.51966	0.57	2.1919	1.98874	0.57	2.54076	2.21124	0.961141	3.98594	4.01072
	Repeat #3	1.07918	3.6416	3.0036	0.5472	1.54475	1.45888	1	2.56363	1.97514	1.02	2.22874	2.06249	1.49202	3.82112	6.15019
	mean	1.39184	4.11184	3.8738	0.705733	1.75837	1.88154	0.856667	2.86699	2.30886	0.863333	2.74232	2.39957	1.46362	4.25652	5.71606
	SD	0.503099	0.687276	1.40024	0.255097	0.315906	0.680108	0.248261	0.867508	0.566287	0.254231	0.638685	0.461057	0.488891	0.616919	1.53503
	P value		2 vs 3 P=0.8046			2 vs 3 P=0.7902			2 vs 3 P=0.4036			2 vs 3 P=0.4930			2 vs 3 P=0.2012
